# Supplementary material for: Parkinson’s Disease Subtypes: Critical Appraisal and Recommendations
Source: PubMed Central journal article supplement — J Parkinsons Dis. 2021 Apr 13;11(2):395–404. doi: 10.3233/JPD-202472 (PMC8150501; doi:10.3233/jpd-202472), 2021-04-13
Supplement: jpd-11-jpd202472-s001.pdf [file jpd-11-jpd202472-s001.pdf]

# Supplementary Material

## Parkinson's Disease Subtypes: Critical Appraisal and Recommendations

### METHODS

#### *Overview*

We conducted a systematic review of Parkinson's disease (PD) subtyping studies in order to summarize methods used and reported characteristics of PD subtypes. The methodological quality of each study and the clinical applicability of each identified PD subtype system were also evaluated using standardized approach.

#### *Eligibility criteria*

PD subtyping studies were defined as any research study conducted with the purpose of dividing PD patients into subtypes, as stated by its authors. We also included studies in which authors did not state the purpose of PD subtyping as the study's objective but identified distinct groups of PD patients in the research which were thereafter discussed as possible subtypes in the paper. Since the goal of the systematic review was to evaluate the methodologic approach for the identification of a PD subtype classification, we only included the initial report of a given PD subtype classification. We did not include further studies conducting additional evaluations of an already described PD subtype classification. The only exception was the report of follow-up data by the researchers of the initial report, as we considered them part of the same study. We did not exclude studies that used the same database, as long as these studies used distinct defining criteria or approaches to identify a new PD subtype classification system. Studies were conducted with participants diagnosed with PD regardless of the applied diagnostic criteria. We accepted any type

of study design, and both clinical and non-clinical biomarkers as measures. We only included full-text publications written in English. We excluded studies or results within a study which compared PD with healthy controls or other neurological disorders, studies evaluating previously-defined PD subtypes (i.e., tremor dominant vs. PIGD) or using a mixed group of patients as unit of analyses, biomarker studies with no categorical results (no sub-grouping of patients based on the biomarker), studies restricted to a subset of PD patients (e.g., cognitively impaired) and review articles.

### *Search strategy*

We searched for PD subtyping studies in the medical databases PUBMED/MEDLINE and used the following search terms: ‘Parkinson Disease’[Mesh] AND (‘Subtyp\*’ OR ‘Phenotype’[Mesh] OR ‘Phenotyp\*’ OR ‘Biomarkers’[Mesh] OR ‘Clinical Feature\*’ OR ‘endophenotyp\*’). We reviewed the bibliographic references of included studies and review papers identified through the above search strategy. The initial search was done up to September 2018, and it was complemented by a second search using the same search items up to June 2019. Three expert reviewers (SMF, TAM, CM) were responsible for the initial screening of each abstract identified through the search. Any disagreements regarding abstract inclusion between the two reviewers were discussed with and assessed by the third reviewer for a final decision. Each full-text article of abstracts remaining after the initial screen was reviewed by at least two members of the MDS Task Force, who made final decisions regarding inclusion of the paper and performed data collection.

### *Data collection*

Pairs of reviewers abstracted data from the original studies regarding study design, baseline characteristics, PD subtyping methodology and results were entered into a standardized data sheet. Reviewers could not evaluate their own studies.

### *Rating schemes*

In the absence of available tools to specifically evaluate subtyping studies, we developed our own checklists to assess the methodological quality and clinical applicability of the included studies. The Methodological Quality tool is a 13-item checklist with item scores ranging from 0 to 2. A higher score corresponds to higher methodological quality. The Clinical Applicability tool is an 11-item checklist with items rated as Unknown, Limited/Low, Moderate, and Strong. We drafted an initial version based on available standardized checklists [1]. After reaching a consensus across the Task Force in terms of items and response options, we tested the application of both tools in a sample of included studies (N=5) to refine the tools and finalize the version used in this review. An item on appraisal of statistical methods was included in the Methodological Quality tool. Due to the heterogeneity of the statistical methods used, a pair of statisticians (MM, ML) was given the task of reaching a consensus on rating criteria for this item based on pre-defined statistical evaluative concepts. The same pair of statisticians obtained a final score (0=low quality, 1=intermediate quality, 2=high quality) by consensus, taking into account all aspects of the study and incorporating discussion to arrive at agreement, recording reasons for sub-optimal ratings. For both study data collection and rating schemes, reviewers were requested to extract data and rate the studies independently. Discrepancies were subsequently resolved by consensus between the raters within a pair.

### *Data analysis*

We provide descriptive statistics of the data abstracted and ratings of the Methodological Quality and Clinical Applicability tools. We used chi-square tests (or Fisher's exact test, as appropriate) to compare the relative frequencies of ratings by individual items between two publication periods (1980-2014 vs. 2015-2019) as well as between two methodological approaches (data-driven vs. hypothesis-driven).

### **REFERENCE**

- [1] Marras C, Lang A (2013) Parkinson's disease subtypes: lost in translation? *J Neurol Neurosurg Psychiatry* **84**, 409-415.

**Supplementary Table 1.** 11-item checklist for Clinical Applicability (items rated as Unknown, Limited/Low, Moderate, and Strong) developed for the current systematic review.

| <b>Item</b>                                                                                                                                                       | <b>Level</b>                                                                                                                                                             |
|-------------------------------------------------------------------------------------------------------------------------------------------------------------------|--------------------------------------------------------------------------------------------------------------------------------------------------------------------------|
| <b>Subtyping Algorithm</b>                                                                                                                                        | Strong - Easily applied (availability of measurement and invasiveness)<br>Moderate<br>Limited - Applied with difficulty (measures are invasive or not readily available) |
| <b>Time Required</b>                                                                                                                                              | Strong - Manageable in one visit (15-30 min)<br>Moderate<br>Limited - Time-consuming                                                                                     |
| <b>Applicable to Drug-Naïve Stage</b>                                                                                                                             | Strong - yes<br>Moderate - maybe<br>Limited - no                                                                                                                         |
| <b>Cost</b>                                                                                                                                                       | Strong - affordable<br>Moderate<br>Limited - Expensive                                                                                                                   |
| <b>Subtype Stability</b>                                                                                                                                          | Stable<br>Unstable<br>Unknown                                                                                                                                            |
| <b>Applicability to general population<br/>(primarily based on results from external validation but also and recruitment study setting and recruitment basis)</b> | Strong - High<br>Moderate<br><br>Limited - Low                                                                                                                           |
| <b>Prognostic Value</b>                                                                                                                                           | Strong - High<br>Moderate<br>Limited - Low<br>Unknown                                                                                                                    |
| <b>Treatment Implication</b>                                                                                                                                      | Strong - High<br>Moderate<br>Limited - Low<br>Unknown                                                                                                                    |
| <b>Clinical importance of differences in the variables used to define subtypes</b>                                                                                | Strong - High<br>Moderate<br>Limited - Low<br>Unknown                                                                                                                    |
| <b>Clinical importance of differences in external clinical/demographic features between subtypes</b>                                                              | Strong - High<br>Moderate<br>Limited - Low<br>Unknown                                                                                                                    |
| <b>Clinical importance of differences in pathological/biomarker features between subtypes</b>                                                                     | Strong - High<br>Moderate<br>Limited - Low<br>Unknown                                                                                                                    |

**Supplementary Table 2.** Individual item scores in the Methodological Quality tool for each study included in the systematic review on PD subtypes.

| Study ID (Year, First author) | Disease stages/duration (study population) | Study setting (representativeness)                                 | Recruitment source (generalizability) | Diagnostic methods               | Sampling method                                                             | Comprehensiveness of data used for subtyping (subtype definition) | Variables compared between subtypes (post hoc) | Statistical methods quality rating      | Longitudinal follow-up | Completeness of follow-up                                    | Subtype stability                                     | Algorithm for Classifying individual patients | Validation (internal or external) |                                                |
|-------------------------------|--------------------------------------------|--------------------------------------------------------------------|---------------------------------------|----------------------------------|-----------------------------------------------------------------------------|-------------------------------------------------------------------|------------------------------------------------|-----------------------------------------|------------------------|--------------------------------------------------------------|-------------------------------------------------------|-----------------------------------------------|-----------------------------------|------------------------------------------------|
| 1984                          | Picirilli                                  | 0 = mixture of stages/disease duration at baseline or not reported | 0 = single-center or not reported     | 0 = clinic-based or not reported | 1 = Use of formal diagnostic criteria or diagnosis by an expert neurologist | 1 = consecutive or random                                         | 0 = single clinical or biomarker domain        | 2 =>1 clinical domains or biomarkers;   | 1                      | 1 = short-term (1-3 years) OR longer-term but <3 time-points | 1 = 50-75% complete                                   | 0 = not assessed                              | 1 = provided                      | 0 = not assessed                               |
| 1986                          | Santamaria                                 | 1 = homogeneous disease stage/duration                             | 0 = single-center or not reported     | 0 = clinic-based or not reported | 2 = Use of formal diagnostic criteria or diagnosis by an expert neurologist | 1 = consecutive or random                                         | 0 = single clinical or biomarker domain        | 2 =>1 clinical domains or biomarkers;   | 0                      | 0 = none (cross-sectional) or longitudinal <1 year           | 0 = cross-sectional or <=50% complete or not reported | 0 = not assessed                              | 1 = provided                      | 0 = not assessed                               |
| 1987                          | Mortimer                                   | 0 = mixture of stages/disease duration at baseline or not reported | 0 = single-center or not reported     | 0 = clinic-based or not reported | 0 = not described or 1 or 2 not applicable                                  | 0 = convenience or not reported                                   | 0 = single clinical or biomarker domain        | 1 = single clinical domain or biomarker | 0                      | 0 = none (cross-sectional) or longitudinal <1 year           | 0 = cross-sectional or <=50% complete or not reported | 0 = not assessed                              | 0 = not provided                  | 0 = not assessed                               |
| 1990                          | Jankovic                                   | 1 = homogeneous disease stage/duration                             | 1 = multi-center                      | 0 = clinic-based or not reported | 1 = Use of formal diagnostic criteria or diagnosis by an expert neurologist | 0 = convenience or not reported                                   | 0 = single clinical or biomarker domain        | 2 =>1 clinical domains or biomarkers;   | 1                      | 0 = none (cross-sectional) or longitudinal <1 year           | 0 = cross-sectional or <=50% complete or not reported | 0 = not assessed                              | 1 = provided                      | 0 = not assessed                               |
| 1994                          | Friedman                                   | 0 = mixture of stages/disease duration at baseline or not reported | 0 = single-center or not reported     | 0 = clinic-based or not reported | 0 = not described or 1 or 2 not applicable                                  | 0 = convenience or not reported                                   | 0 = single clinical or biomarker domain        | 2 =>1 clinical domains or biomarkers;   | 0                      | 0 = none (cross-sectional) or longitudinal <1 year           | 0 = cross-sectional or <=50% complete or not reported | 0 = not assessed                              | 1 = provided                      | 0 = not assessed                               |
| 1999                          | Graham                                     | 0 = mixture of stages/disease duration at baseline or not reported | 0 = single-center or not reported     | 0 = clinic-based or not reported | 1 = Use of formal diagnostic criteria or diagnosis by an expert neurologist | 0 = convenience or not reported                                   | 1 =>1 clinical domains or biomarkers           | 2 =>1 clinical domains or biomarkers;   | 1                      | 0 = none (cross-sectional) or longitudinal <1 year           | 0 = cross-sectional or <=50% complete or not reported | 0 = not assessed                              | 0 = not provided                  | 0 = not assessed                               |
| 1999                          | De Ceballos                                | 0 = mixture of stages/disease duration at baseline or not reported | 0 = single-center or not reported     | 0 = clinic-based or not reported | 0 = not described or 1 or 2 not applicable                                  | 0 = convenience or not reported                                   | 1 =>1 clinical domains or biomarkers           | 2 =>1 clinical domains or biomarkers;   | 0                      | 0 = none (cross-sectional) or longitudinal <1 year           | 0 = cross-sectional or <=50% complete or not reported | 0 = not assessed                              | 0 = not provided                  | 0 = not assessed                               |
| 2005                          | Lewis                                      | 0 = mixture of stages/disease duration at baseline or not reported | 0 = single-center or not reported     | 0 = clinic-based or not reported | 1 = Use of formal diagnostic criteria or diagnosis by an expert neurologist | 1 = consecutive or random                                         | 1 =>1 clinical domains or biomarkers           | 2 =>1 clinical domains or biomarkers;   | 1                      | 0 = none (cross-sectional) or longitudinal <1 year           | 0 = cross-sectional or <=50% complete or not reported | 0 = not assessed                              | 0 = not provided                  | 0 = not assessed                               |
| 2009                          | Reijnders                                  | 0 = mixture of stages/disease duration at baseline or not reported | 1 = multi-center                      | 0 = clinic-based or not reported | 1 = Use of formal diagnostic criteria or diagnosis by an expert neurologist | 0 = convenience or not reported                                   | 1 =>1 clinical domains or biomarkers           | 2 =>1 clinical domains or biomarkers;   | 1                      | 0 = none (cross-sectional) or longitudinal <1 year           | 0 = cross-sectional or <=50% complete or not reported | 0 = not assessed                              | 0 = not provided                  | 1                                              |
| 2010                          | White                                      | 0 = mixture of stages/disease duration at baseline or not reported | 1 = multi-center                      | 0 = clinic-based or not reported | 1 = Use of formal diagnostic criteria or diagnosis by an expert neurologist | 0 = convenience or not reported                                   | 0 = single clinical or biomarker domain        | 2 =>1 clinical domains or biomarkers;   | 2                      | 0 = none (cross-sectional) or longitudinal <1 year           | 0 = cross-sectional or <=50% complete or not reported | 0 = not assessed                              | 0 = not provided                  | 0 = not assessed                               |
| 2011                          | Lui                                        | 0 = mixture of stages/disease duration at baseline or not reported | 0 = single-center or not reported     | 0 = clinic-based or not reported | 1 = Use of formal diagnostic criteria or diagnosis by an expert neurologist | 0 = convenience or not reported                                   | 1 =>1 clinical domains or biomarkers           | 2 =>1 clinical domains or biomarkers;   | 0                      | 0 = none (cross-sectional) or longitudinal <1 year           | 0 = cross-sectional or <=50% complete or not reported | 0 = not assessed                              | 0 = not provided                  | 1 = use of a test set from the same population |
| 2011                          | Rooden                                     | 0 = mixture of stages/disease duration at baseline or not reported | 1 = multi-center                      | 0 = clinic-based or not reported | 1 = Use of formal diagnostic criteria or diagnosis by an expert neurologist | 0 = convenience or not reported                                   | 1 =>1 clinical domains or biomarkers           | 2 =>1 clinical domains or biomarkers;   | 0                      | 0 = none (cross-sectional) or longitudinal <1 year           | 0 = cross-sectional or <=50% complete or not reported | 0                                             | 0 = not provided                  | 2 = validation in an external population       |
| 2012                          | Flensburg Damholdt                         | 0 = mixture of stages/disease duration at baseline or not reported | 0 = single-center or not reported     | 0 = clinic-based or not reported | 1 = Use of formal diagnostic criteria or diagnosis by an expert neurologist | 1 = consecutive or random                                         | 0 = single clinical or biomarker domain        | 2 =>1 clinical domains or biomarkers;   | 2                      | 0 = none (cross-sectional) or longitudinal <1 year           | 0 = cross-sectional or <=50% complete or not reported | 0 = not assessed                              | 0 = not provided                  | 0 = not assessed                               |
| 2013                          | Dujardin                                   | 0 = mixture of stages/disease duration at baseline or not reported | 1 = multi-center                      | 0 = clinic-based or not reported | 1 = Use of formal diagnostic criteria or diagnosis by an expert neurologist | 0 = convenience or not reported                                   | 0 = single clinical or biomarker domain        | 2 =>1 clinical domains or biomarkers;   | 2                      | 0 = none (cross-sectional) or longitudinal <1 year           | 0 = cross-sectional or <=50% complete or not reported | 0 = not assessed                              | 0 = not provided                  | 0 = not assessed                               |
| 2013                          | Erro                                       | 1 = homogeneous disease stage/duration                             | 0 = single-center or not reported     | 0 = clinic-based or not reported | 1 = Use of formal diagnostic criteria or diagnosis by an expert neurologist | 1 = consecutive or random                                         | 1 =>1 clinical domains or biomarkers           | 0 = not done                            | 1                      | 1 = short-term (1-3 years) OR longer-term but <3 time-points | 0                                                     | 0 = not assessed                              | 0 = not provided                  | 0 = not assessed                               |
| 2014                          | Kim                                        | 0 = mixture of stages/disease duration at baseline or not reported | 0 = single-center or not reported     | 0 = clinic-based or not reported | 1 = Use of formal diagnostic criteria or diagnosis by an expert neurologist | 0 = convenience or not reported                                   | 1 =>1 clinical domains or biomarkers           | 2 =>1 clinical domains or biomarkers;   | 1                      | 0 = none (cross-sectional) or longitudinal <1 year           | 0 = cross-sectional or <=50% complete or not reported | 0 = not assessed                              | 0 = not provided                  | 0 = not assessed                               |
| 2014                          | Gong                                       | 0 = mixture of stages/disease duration at baseline or not reported | 0 = single-center or not reported     | 0 = clinic-based or not reported | 1 = Use of formal diagnostic criteria or diagnosis by an expert neurologist | 0 = convenience or not reported                                   | 0 = single clinical or biomarker domain        | 2 =>1 clinical domains or biomarkers;   | 0                      | 0 = none (cross-sectional) or longitudinal <1 year           | 0 = cross-sectional or <=50% complete or not reported | 0 = not assessed                              | 1 = provided                      | 0 = not assessed                               |



**Supplementary Table 3.** Individual item scores in the Clinical Applicability tool for each study included in the systematic review on PD subtypes.

| Study ID (Year, First author) | Subtyping Algorithm                                                                | Time Required                                | Applicable to Early, Drug-Naïve Stage | Cost                | Subtype Stability | Applicability to general population of PD (primarily based on results from external validation but also and recruitment study satisfied) | Prognostic Value | Potential Treatment Implication of determining these subtypes | Clinical importance of differences in the variables used to define subtypes | Clinical importance of differences in clinical/demographic features between subtypes compared post hoc | Clinical importance of differences in pathological/biomarker features between subtypes |
|-------------------------------|------------------------------------------------------------------------------------|----------------------------------------------|---------------------------------------|---------------------|-------------------|------------------------------------------------------------------------------------------------------------------------------------------|------------------|---------------------------------------------------------------|-----------------------------------------------------------------------------|--------------------------------------------------------------------------------------------------------|----------------------------------------------------------------------------------------|
| 1984 Piccirilli               | Moderate                                                                           | Limited - Time-consuming (>60 min)           | Moderate - maybe                      | Moderate            | Unknown           | Moderate                                                                                                                                 | Strong - High    | Limited - Low                                                 | Strong - High                                                               | Moderate                                                                                               | Unknown                                                                                |
| 1986 Santamaria               | Strong - Easily applied (availability of measurement and invasiveness)             | Moderate                                     | Strong - yes                          | Strong - affordable | Unknown           | Limited - Low                                                                                                                            | Unknown          | Unknown                                                       | Limited - Low                                                               | unknown                                                                                                | Unknown                                                                                |
| 1987 Mortimer                 | Strong - Easily applied (availability of measurement and invasiveness)             | Limited - Time-consuming (>60 min)           | Moderate - maybe                      | Moderate            | Unknown           | Limited - Low                                                                                                                            | Unknown          | Unknown                                                       | Unknown                                                                     | Limited - Low                                                                                          | Limited - Low                                                                          |
| 1990 Jankovic                 | Strong - Easily applied (availability of measurement and invasiveness)             | Strong - Manageable in one visit (15-30 min) | Strong - yes                          | Strong - affordable | Unknown           | Limited - Low                                                                                                                            | Unknown          | Unknown                                                       | Moderate                                                                    | Moderate                                                                                               | Unknown                                                                                |
| 1994 Friedman                 | Strong - Easily applied (availability of measurement and invasiveness)             | Strong - Manageable in one visit (15-30 min) | Strong - yes                          | Strong - affordable | Unknown           | Limited - Low                                                                                                                            | Limited - Low    | Limited - Low                                                 | Moderate                                                                    | Moderate                                                                                               | Unknown                                                                                |
| 1999 Graham                   | Limited - Applied with difficulty (measures are invasive or not readily available) | Limited - Time-consuming (>60 min)           | Limited - no                          | Moderate            | Unknown           | Limited - Low                                                                                                                            | Unknown          | Moderate                                                      | Moderate                                                                    | Moderate                                                                                               | Unknown                                                                                |
| 1999 De Ceballos              | Limited - Applied with difficulty (measures are invasive or not readily available) | Limited - Time-consuming (>60 min)           | Limited - no                          | Limited - Expensive | Unknown           | Limited - Low                                                                                                                            | Limited - Low    | Unknown                                                       | Unknown                                                                     | Unknown                                                                                                | Unknown                                                                                |
| 2005 Lewis                    | Limited - Applied with difficulty (measures are invasive or not readily available) | Limited - Time-consuming (>60 min)           | Limited - no                          | Moderate            | Unknown           | Limited - Low                                                                                                                            | Unknown          | Limited - Low                                                 | Limited - Low                                                               | Unknown                                                                                                | Unknown                                                                                |
| 2009 Reijnders                | Strong - Easily applied (availability of measurement and invasiveness)             | Moderate                                     | moderate - maybe                      | strong - affordable | Unknown           | Limited - Low                                                                                                                            | Unknown          | Unknown                                                       | Limited - Low                                                               | moderate                                                                                               | Unknown                                                                                |
| 2010 White                    | Limited - Applied with difficulty (measures are invasive or not readily available) | Moderate                                     | Strong - yes                          | Strong - affordable | Unknown           | Strong - High                                                                                                                            | Limited - Low    | Unknown                                                       | Unknown                                                                     | Limited - Low                                                                                          | Unknown                                                                                |
| 2011 Rooden                   | Limited - Applied with difficulty (measures are invasive or not readily available) | Limited - Time-consuming (>60 min)           | Limited - no                          | Moderate            | Unknown           | Moderate                                                                                                                                 | Unknown          | Limited - Low                                                 | Moderate                                                                    | Moderate                                                                                               | Unknown                                                                                |
| 2011 Lui                      | Moderate                                                                           | Limited - Time-consuming (>60 min)           | Moderate - maybe                      | Moderate            | Unknown           | Moderate                                                                                                                                 | Moderate         | Moderate                                                      | Moderate                                                                    | Moderate                                                                                               | Unknown                                                                                |
| 2012 Flensburg Damholdt       | Strong - Easily applied (availability of measurement and invasiveness)             | Strong - Manageable in one visit (15-30 min) | Moderate - maybe                      | Strong - affordable | Unknown           | Moderate                                                                                                                                 | Unknown          | Unknown                                                       | Unknown                                                                     | Limited - Low                                                                                          | Unknown                                                                                |
| 2013 Dujardin                 | Strong - Easily applied (availability of measurement and invasiveness)             | Limited - Time-consuming (>60 min)           | Strong - yes                          | Strong - affordable | Unknown           | Strong - High                                                                                                                            | Unknown          | Unknown                                                       | Strong - High                                                               | Strong - High                                                                                          | Unknown                                                                                |
| 2013 Erro                     | Strong - Easily applied (availability of measurement and invasiveness)             | Moderate                                     | Strong - yes                          | Strong - yes        | Unknown           | Moderate                                                                                                                                 | Limited - Low    | Unknown                                                       | Strong - High                                                               | Unknown                                                                                                | Unknown                                                                                |
| 2014 Gong                     | Limited - Applied with difficulty (measures are invasive or not readily available) | Limited - Time-consuming (>60 min)           | Moderate - maybe                      | Moderate            | Unknown           | Limited - Low                                                                                                                            | Unknown          | Unknown                                                       | Limited - Low                                                               | Moderate                                                                                               | Unknown                                                                                |
| 2014 Kim                      | Strong - Easily applied (availability of measurement and invasiveness)             | Strong - Manageable in one visit (15-30 min) | moderate - maybe                      | Strong - affordable | Unknown           | Limited - Low                                                                                                                            | Unknown          | Unknown                                                       | Unknown                                                                     | Limited - Low                                                                                          | Unknown                                                                                |



|      |                |                                                                                    |                                              |                  |                                                                 |                                                                  |               |               |               |               |               |               |
|------|----------------|------------------------------------------------------------------------------------|----------------------------------------------|------------------|-----------------------------------------------------------------|------------------------------------------------------------------|---------------|---------------|---------------|---------------|---------------|---------------|
| 2015 | Erro           | Strong - Easily applied (availability of measurement and invasiveness)             | Strong - Manageable in one visit (15-30 min) | Strong - yes     | Strong - affordable                                             | Unknown                                                          | Moderate      | Limited - Low | Limited - Low | Moderate      | Limited - Low | Moderate      |
| 2015 | Fereshtehnejad | Moderate                                                                           | Limited - Time-consuming (>60 min)           | Strong - yes     | Moderate                                                        | Unknown                                                          | Limited - Low | Strong - High | Unknown       | Unknown       | Unknown       | Unknown       |
| 2015 | Lawton         | Strong - Easily applied (availability of measurement and invasiveness)             | Limited - Time-consuming (>60 min)           | Strong - yes     | Strong - yes                                                    | Unknown                                                          | Moderate      | Unknown       | Unknown       | Strong - High | Limited - Low | Unknown       |
| 2015 | Lee            | Strong - Easily applied (availability of measurement and invasiveness)             | Strong - Manageable in one visit (15-30 min) | Strong - yes     | Strong - affordable                                             | Unknown                                                          | Limited - Low | Unknown       | Unknown       | Moderate      | Moderate      | Unknown       |
| 2015 | Seichepine     | Moderate                                                                           | Strong - Manageable in one visit (15-30 min) | Strong - yes     | Strong - affordable                                             | Unknown                                                          | Limited - Low | Unknown       | Limited - Low | Limited - Low | Limited - Low | Unknown       |
| 2015 | Tsujikawa      | Limited - Applied with difficulty (measures are invasive or not readily available) | Limited - Time-consuming (>60 min)           | Moderate - maybe | Limited - Expensive                                             | Unknown                                                          | Strong - High | Moderate      | Limited - Low | Strong - High | Strong - High | Strong - High |
| 2015 | Ma             | Strong - Easily applied (availability of measurement and invasiveness)             | limited - Time-consuming (>60 min)           | moderate - maybe | strong - affordable                                             | Unknown                                                          | moderate      | Unknown       | Unknown       | Limited - Low | moderate      | Limited - Low |
| 2016 | Erro           | Limited - Applied with difficulty (measures are invasive or not readily available) | Limited - Time-consuming (>60 min)           | Strong - yes     | Moderate                                                        | Unknown                                                          | Moderate      | Unknown       | Limited - Low | Moderate      | Moderate      | Unknown       |
| 2016 | van Balkom     | Moderate                                                                           | Limited - Time-consuming (>60 min)           | Moderate - maybe | Moderate                                                        | Unknown                                                          | Moderate      | Unknown       | Unknown       | Moderate      | Moderate      | Unknown       |
| 2016 | Berganzo       | Limited - Applied with difficulty (measures are invasive or not readily available) | Limited - Time-consuming (>60 min)           | Limited - no     | Limited - Expensive                                             | Unknown                                                          | Limited - Low | Unknown       | Unknown       | Unknown       | Unknown       | Unknown       |
| 2016 | Uribe          | Moderate                                                                           | Limited - Time-consuming (>60 min)           | Strong - yes     | Moderate                                                        | Unknown                                                          | Strong - High | Moderate      | Moderate      | Limited - Low | Limited - Low | Unknown       |
| 2016 | Landau         | Strong - Easily applied (availability of measurement and invasiveness)             | Limited - Time-consuming (>60 min)           | Strong - yes     | Strong - affordable                                             | Strong - Stable over long-term period                            | Strong - High | Moderate      | Moderate      | Moderate      | Limited - Low | Unknown       |
| 2017 | Belvisi        | Strong - Easily applied (availability of measurement and invasiveness)             | Strong - Manageable in one visit (15-30 min) | Strong - yes     | Strong - affordable                                             | Unknown                                                          | Moderate      | Unknown       | Unknown       | Unknown       | Limited - Low | Unknown       |
| 2017 | Brennan L      | Moderate                                                                           | Limited - Time-consuming (>60 min)           | Strong - yes     | Strong - affordable                                             | Unknown                                                          | Strong - High | Unknown       | Unknown       | Strong - High | Strong - High | Unknown       |
| 2017 | Eisinger       | Strong - Easily applied (availability of measurement and invasiveness)             | Strong - Manageable in one visit (15-30 min) | Strong - yes     | Strong - yes                                                    | Limited - Unstable with substantial shift over short-term period | Strong - High | Unknown       | Unknown       | Strong - High | Unknown       | Unknown       |
| 2017 | Fereshtehnejad | Limited - Applied with difficulty (measures are invasive or not readily available) | Limited - Time-consuming (>60 min)           | Strong - yes     | Moderate                                                        | Unknown                                                          | Limited - Low | Limited - Low | Unknown       | Strong - High | strong - High | Limited - Low |
| 2018 | Lawton         | Limited - Applied with difficulty (measures are invasive or not readily available) | Limited - Time-consuming (>60 min)           | Moderate - maybe | Limited - Expensive                                             | Unknown                                                          | Limited - Low | Moderate      | Unknown       | Moderate      | Strong - High | Unknown       |
| 2018 | Vavougios      | Moderate                                                                           | Moderate                                     | Moderate - maybe | Unknown - an algorithm to classify individuals was not reported | Unknown                                                          | Moderate      | Unknown       | Moderate      | Unknown       | Unknown       | Unknown       |
| 2018 | Alonso-Recio   | Strong - Easily applied (availability of measurement and invasiveness)             | Limited - Time-consuming (>60 min) (>60 min) | Limited - no     | Moderate                                                        | Unknown                                                          | Moderate      | Strong - High | Moderate      | Moderate      | Unknown       | Unknown       |
| 2018 | Battista       | Limited - Applied with difficulty (measures are invasive or not readily available) | Limited - Time-consuming (>60 min)           | Limited - no     | Unknown - an algorithm to classify individuals was not reported | Unknown                                                          | Limited - Low |
| 2019 | Zhang          | Limited - Applied with difficulty (measures are invasive or not readily available) | Limited - Time-consuming (>60 min)           | Strong - yes     | Strong - affordable                                             | Unknown                                                          | Limited - Low | Moderate      | Limited - Low | Moderate      | Moderate      | Strong - High |

**Supplementary Table 4.** Item score distribution in the Methodological Quality tool administered to PD subtype studies included in the systematic review and dichotomized according to year of publication. A higher item score corresponds to a better methodological quality for a given item.

| Date of publication | Item  |              |              |             |              |              |              |              |             |              |              |              |              |              |
|---------------------|-------|--------------|--------------|-------------|--------------|--------------|--------------|--------------|-------------|--------------|--------------|--------------|--------------|--------------|
|                     | Score | 1            | 2            | 3           | 4            | 5            | 6            | 7            | 8           | 9            | 10           | 11           | 12           | 13           |
| 1980-2014<br>(n=17) | 0     | 14<br>(82.4) | 12<br>(70.6) | 17<br>(100) | 3<br>(17.6)  | 12<br>(70.6) | 9<br>(52.9)  | 1<br>(5.9)   | 7<br>(41.2) | 15<br>(88.2) | 16<br>(94.1) | 17<br>(100)  | 12<br>(70.6) | 14<br>(82.4) |
|                     | 1     | 3<br>(17.6)  | 5<br>(29.4)  | 0<br>(0)    | 13<br>(76.5) | 5<br>(29.4)  | 8<br>(47.1)  | 1<br>(5.9)   | 7<br>(41.2) | 2<br>(11.8)  | 1<br>(5.9)   | 0<br>(0)     | 5<br>(29.4)  | 2<br>(11.8)  |
|                     | 2     | -            | -            | -           | 1<br>(5.9)   | -            | -            | 15<br>(88.2) | 3<br>(17.6) | 0<br>(0)     | 0<br>(0)     | -            | -            | 1<br>(5.9)   |
| 2015-2019<br>(n=21) | 0     | 13<br>(61.9) | 10<br>(47.6) | 21<br>(100) | 2<br>(9.5)   | 18<br>(85.7) | 10<br>(47.6) | 2<br>(9.5)   | 5<br>(23.8) | 12<br>(57.1) | 15<br>(71.4) | 19<br>(90.5) | 16<br>(76.2) | 18<br>(85.7) |
|                     | 1     | 8<br>(38.1)  | 11<br>(52.4) | 0<br>(0)    | 19<br>(90.5) | 3<br>(14.3)  | 11<br>(52.4) | 0<br>(0)     | 7<br>(33.3) | 5<br>(23.8)  | 2<br>(9.5)   | 2<br>(9.5)   | 5<br>(23.8)  | 2<br>(9.5)   |
|                     | 2     | -            | -            | -           | 0<br>(0)     | -            | -            | 19<br>(90.5) | 9<br>(42.9) | 4<br>(19)    | 4<br>(19)    | -            | -            | 1<br>(4.8)   |

1. Disease stages/duration (study population), 2. Study setting (representativeness), 3. Recruitment source (generalizability), 4. Diagnostic methods, 5. Sampling method, 6. Comprehensiveness of data used for subtyping (subtype definition), 7. Variables compared between subtypes (post hoc), 8. Statistical methods quality rating, 9. Longitudinal follow-up, 10. Completeness of follow-up, 11. Subtype stability, 12. Algorithm for classifying individual patients. 13. Validation (internal or external)

Supplementary Figure 1. Study flowchart as per PRISMA guidelines

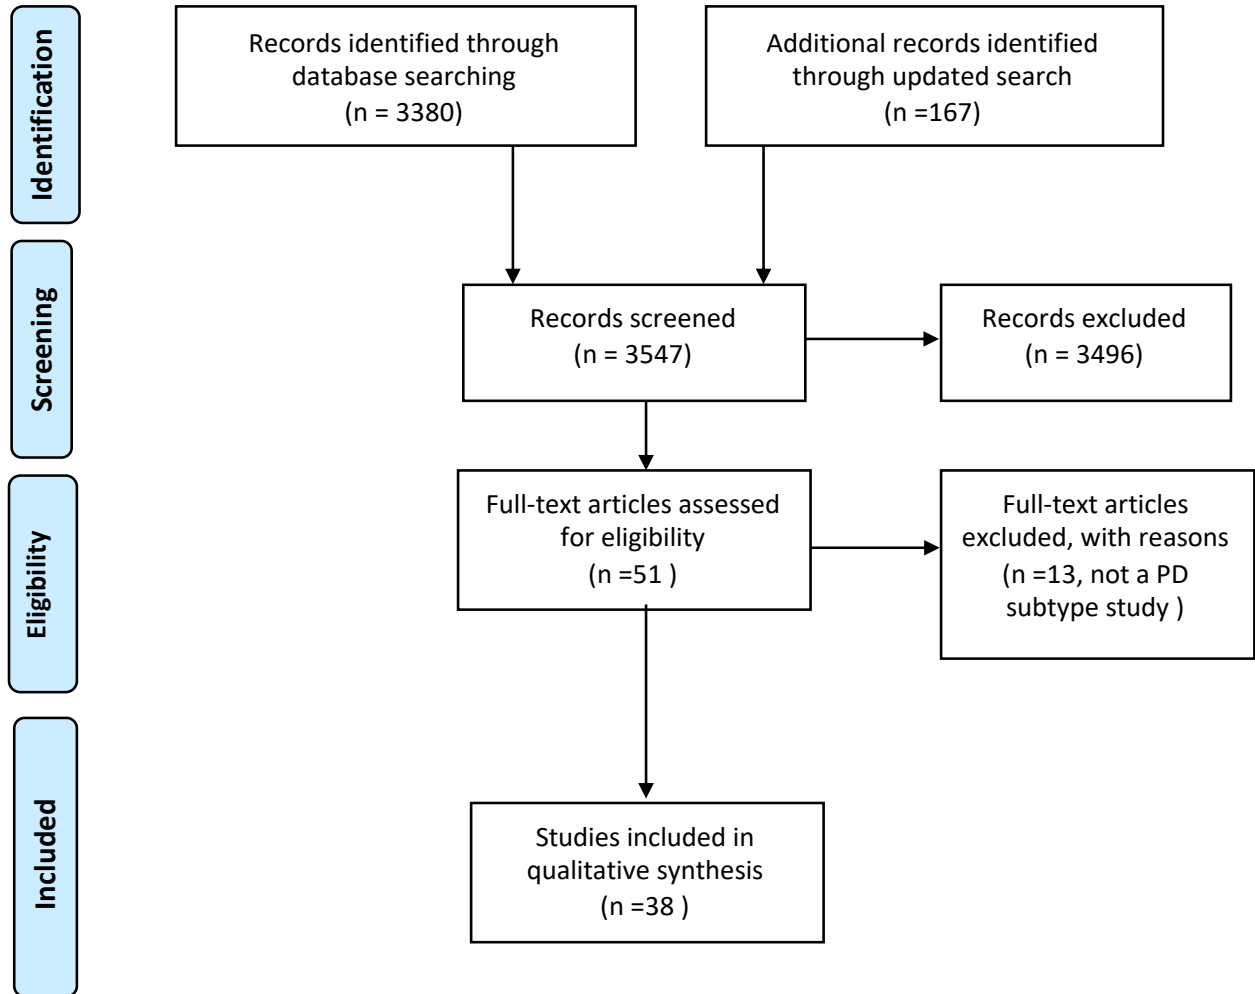

**Supplementary Figure 2.** Item score distribution in the Clinical Applicability tool of subtyping studies using a data-driven or hypothesis-driven approach.

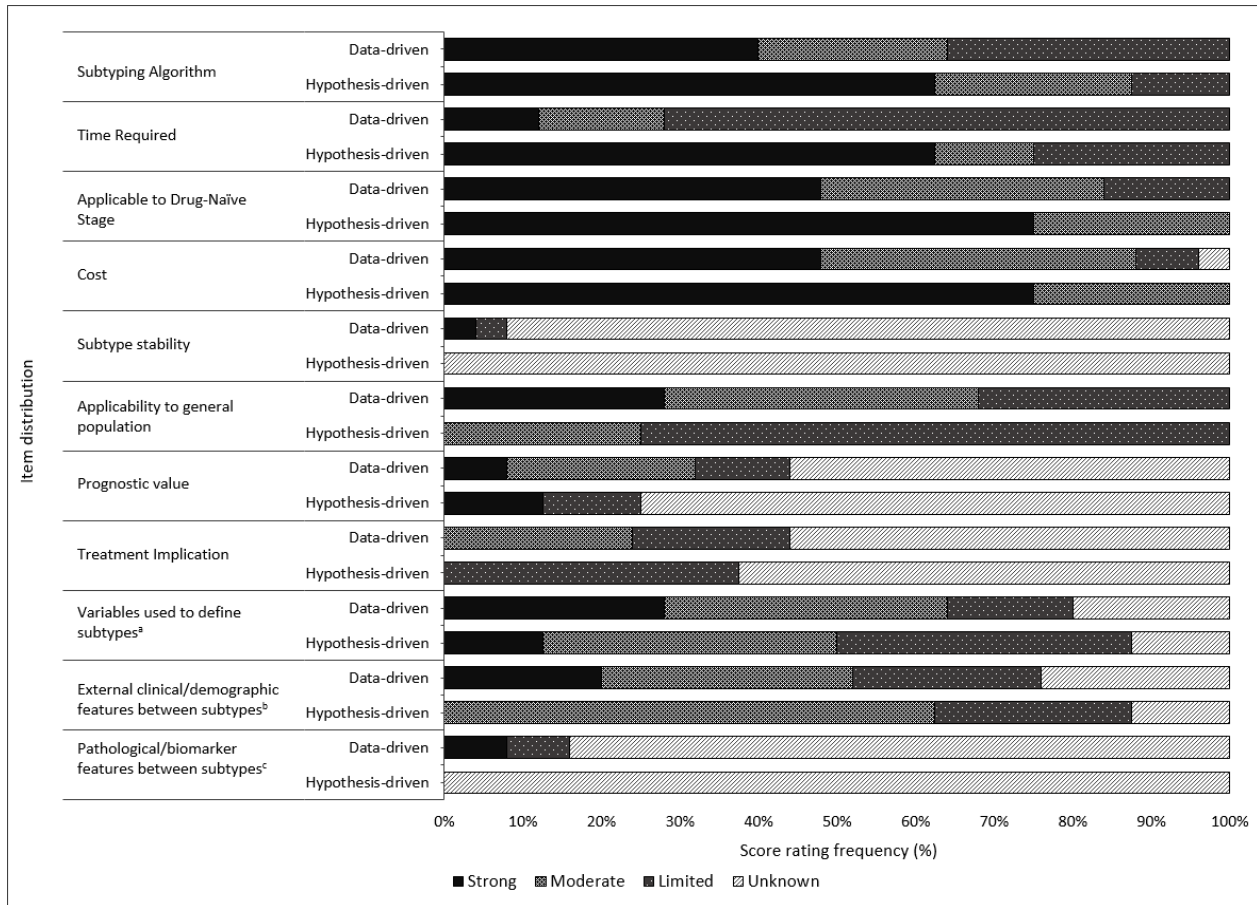

a: Clinical importance of differences in the variables used to define subtypes. b: Clinical importance of differences in external clinical/demographic features between subtypes. c: Clinical importance of differences in pathological/biomarker features between subtypes.

**Supplementary Figure 3.** Item score distribution in the Clinical Applicability tool and dichotomized according to year of publication.

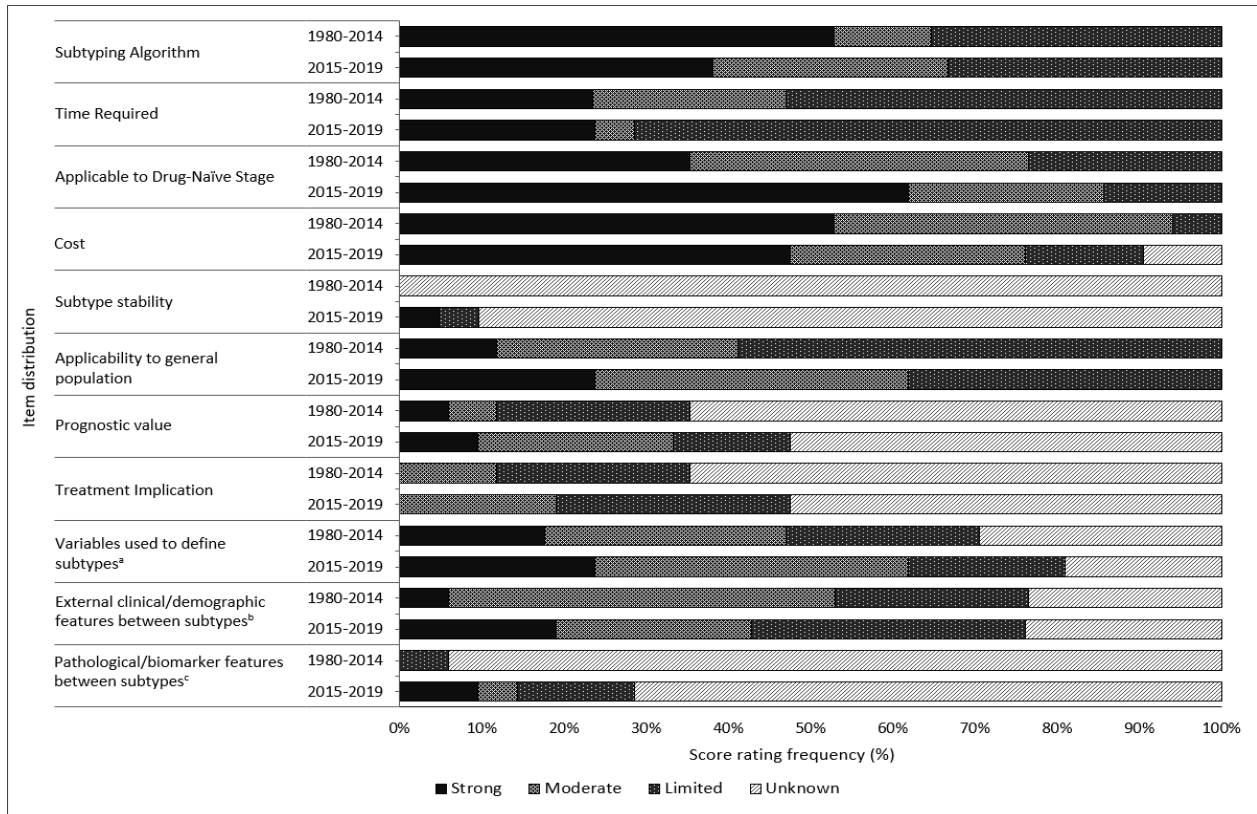

a: Clinical importance of differences in the variables used to define subtypes. b: Clinical importance of differences in external clinical/demographic features between subtypes. c: Clinical importance of differences in pathological/biomarker features between subtypes.
